# Supplementary material for: Towards tailored hierarchical structures in cellulose nanocomposite biofoams prepared by freezing/freeze-drying
Source: Royal Society of Chemistry journal article supplement (doi:10.1039/c0jm00779j), 2010-01-01
Supplement: c0jm00779j.pdf [file c0jm00779j.pdf]

Starch foam

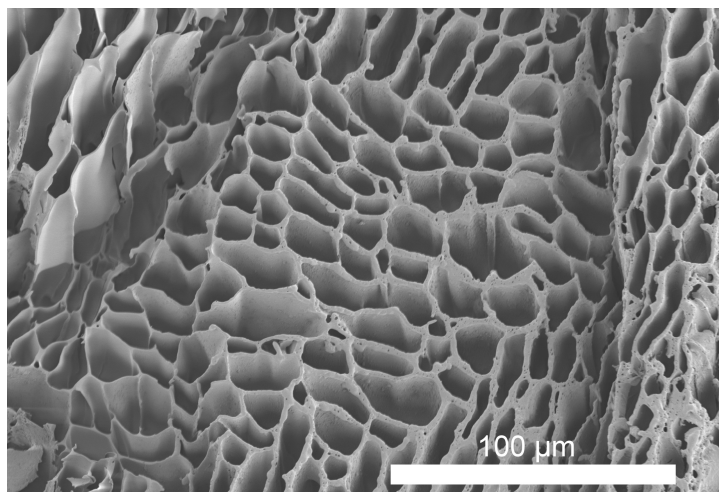

Composite foam (MFC/PAP, 60/40)

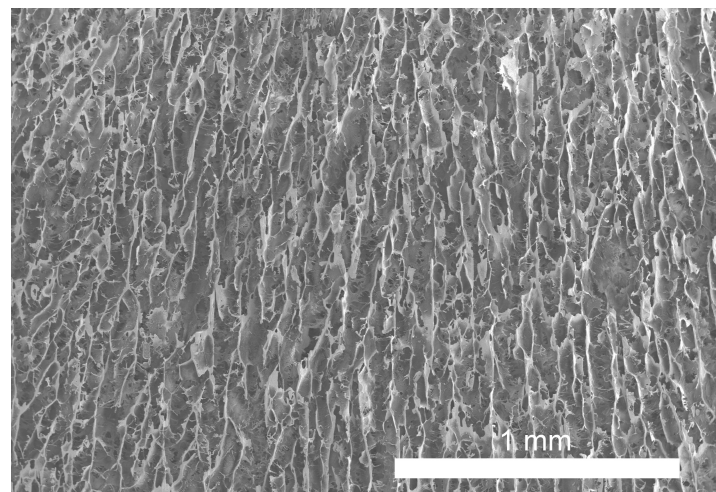

**Fig. S1.** FE-SEM micrographs of typical cell structures observed in neat starch foams and composites foams (60 wt% cellulose nanofibers) obtained in *freeze-drying experiments*. The freeze-drying temperature used to obtain the presented foams was - 45 °C. The scale bars are 1 mm (composite foam) and 100  $\mu\text{m}$  (starch foam).
